# Supplementary material for: Cancer cell responses to Hsp70 inhibitor JG-98: Comparison with Hsp90 inhibitors and finding synergistic drug combinations
Source: PubMed Central journal article supplement (PMC5813176; doi:10.1038/s41598-017-14900-0), 2018-02-14
Supplement: 41598_2017_14900_MOESM1_ESM.pdf [file 41598_2017_14900_MOESM1_ESM.pdf]

## Supplement

### **Cancer cell responses to Hsp70 inhibitor JG-98: Comparison with Hsp90 inhibitors and finding synergistic drug combinations.**

Julia A. Yaglom, Yongmei Wang, Amy Li, Zhenghu Li, Stefano Monti, Ilya Alexandrov, Xiongbing Lu, Michael Y. Sherman

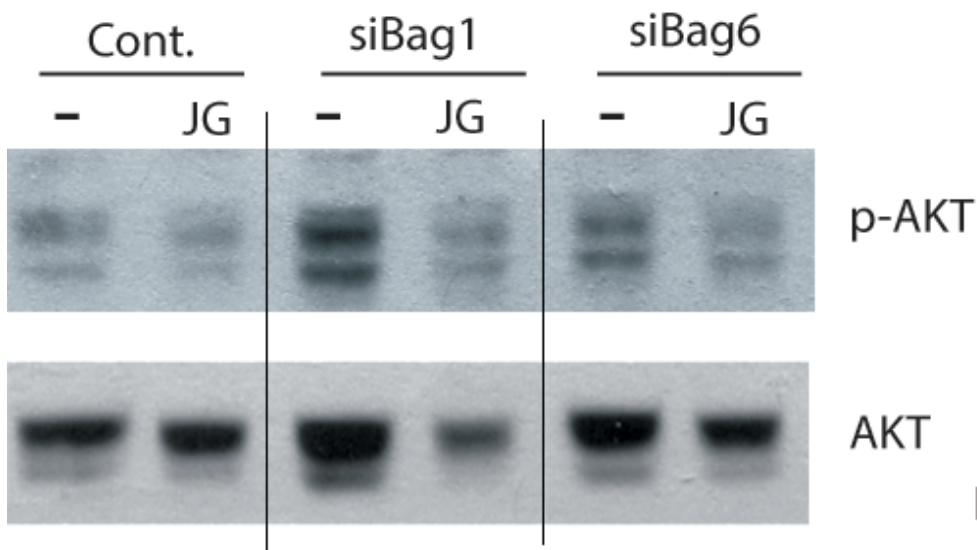

Fig. S1

**Fig. S1. JG-98 downregulates AKT in Bag1- and Bag6-independent manner.** MCF7 cells were transfected with either anti-Bag1 or anti-Bag6 siRNAs (see Materials and Methods) prior to treatment with 2 $\mu$ M of JG-98 for 36h. Levels of Akt and pAkt were determined in cell lysates by immunoblotting with corresponding antibody.

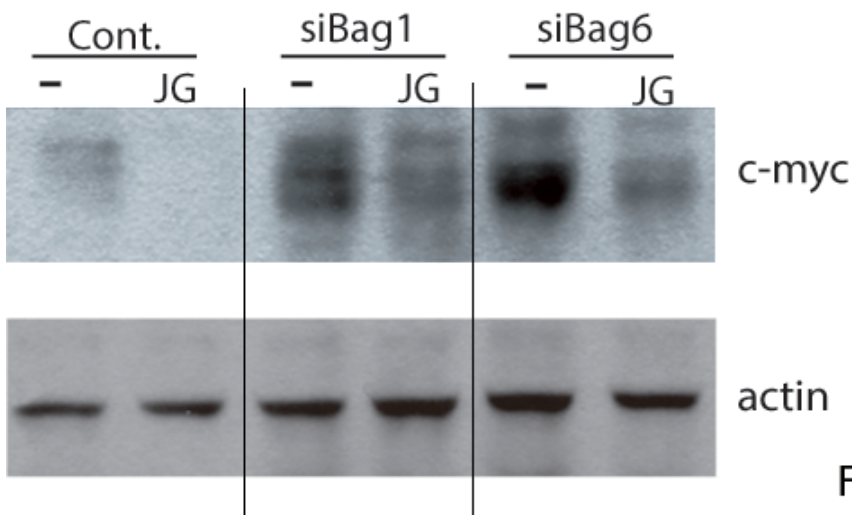

Fig. S2

**Fig. S2. JG-98 downregulates c-myc in Bag1- and Bag6-independent manner.** MCF7 cells were transfected with either anti-Bag1 or anti-Bag6 siRNAs as in Fig. S1 and treated with 2 $\mu$ M of JG-98 for 36h. Levels of c-myc were determined in cell lysates by immunoblotting with corresponding antibody.

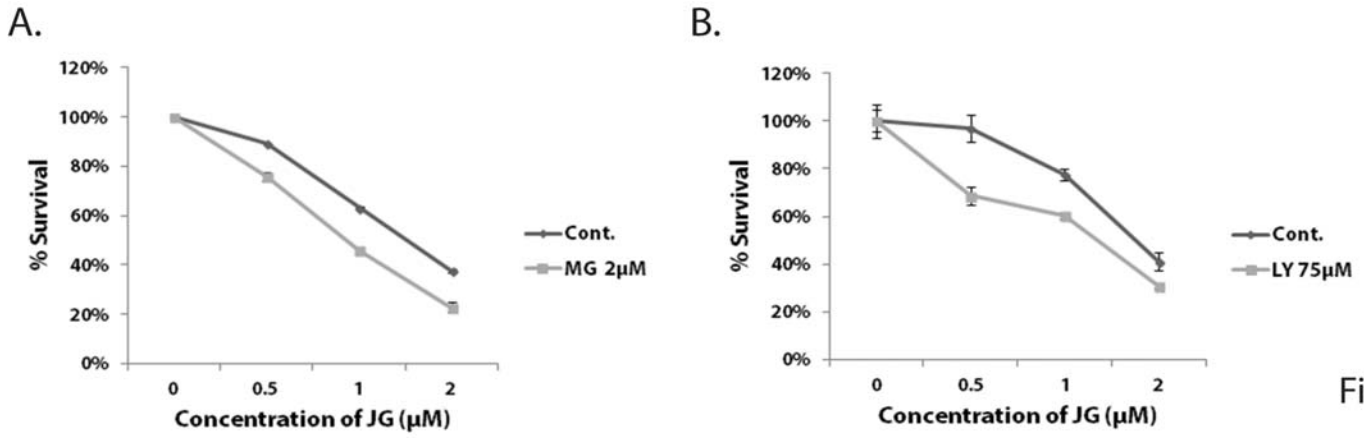

Fig. S3

**Fig. S3. Validation of effects of combinations of JG-98 with MG132 and LY294002 in BT474 cells.** Sub-toxic concentrations of drugs were determined and effects of JG-98 either alone or in combination with these drugs were determined by MTT assay.

MCF7 JG treatment

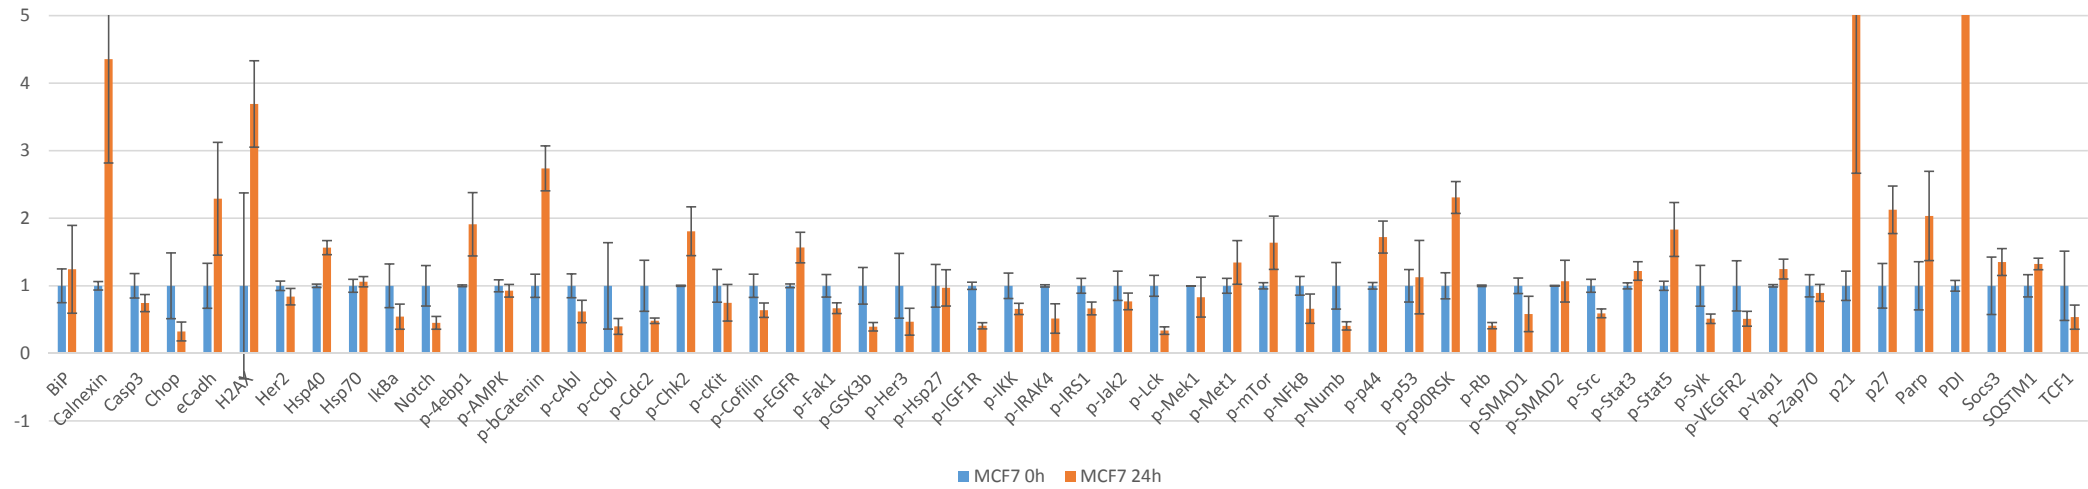

MDA JG treatment

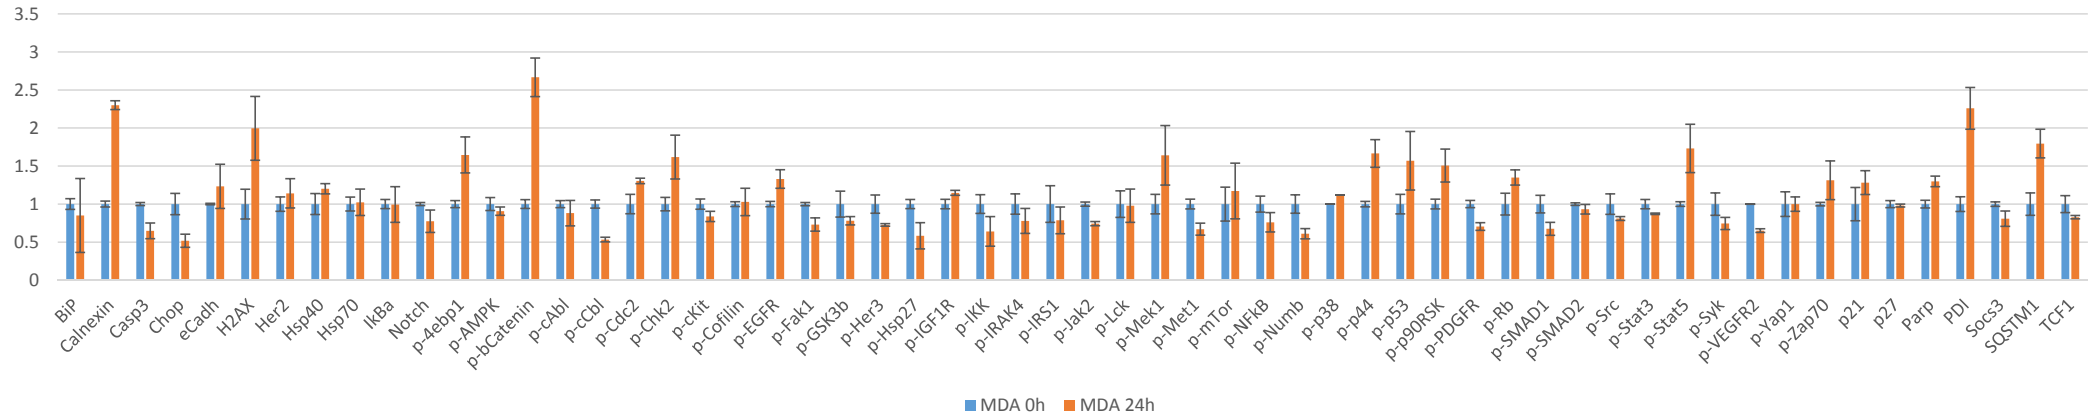

Fig. S4

**Fig. S4. Effect of JG-98 on multiple signaling proteins.** The experiment was done using the iPAD platform by ActivSignal, Inc., see the text.

**Table S1. Links to the Connectivity Map comparison of effects of JG-98 and tanespimycin.** Links show drugs with connectivity to JG-98 and tanespimycin based on gene expression data in the database.

Table S1 cmap\_report

| Cell line | Pert name    | Dose( $\mu$ M) | url_hyperlink                                                                                                                                                                                                                                                                                                                                             |
|-----------|--------------|----------------|-----------------------------------------------------------------------------------------------------------------------------------------------------------------------------------------------------------------------------------------------------------------------------------------------------------------------------------------------------------|
| HEPG2     | tanespimycin | 10             | <a href="http://c3.lincsccloud.org/~user165/mar23/my_analysis.sig_quest_tool.2016032314335591/query_result/tail.result_WTCS_POL001_HEPG2_24H_BRD-A61304759_10_n2000.html">http://c3.lincsccloud.org/~user165/mar23/my_analysis.sig_quest_tool.2016032314335591/query_result/tail.result_WTCS_POL001_HEPG2_24H_BRD-A61304759_10_n2000.html</a>             |
| HT29      | tanespimycin | 10             | <a href="http://c3.lincsccloud.org/~user165/mar23/my_analysis.sig_quest_tool.2016032314335591/query_result/tail.result_WTCS_POL001_HT29_24H_BRD-A61304759_10_n2000.html">http://c3.lincsccloud.org/~user165/mar23/my_analysis.sig_quest_tool.2016032314335591/query_result/tail.result_WTCS_POL001_HT29_24H_BRD-A61304759_10_n2000.html</a>               |
| JURKAT    | tanespimycin | 10             | <a href="http://c3.lincsccloud.org/~user165/mar23/my_analysis.sig_quest_tool.2016032314335591/query_result/tail.result_WTCS_POL001_JURKAT_24H_BRD-A61304759_10_n2000.html">http://c3.lincsccloud.org/~user165/mar23/my_analysis.sig_quest_tool.2016032314335591/query_result/tail.result_WTCS_POL001_JURKAT_24H_BRD-A61304759_10_n2000.html</a>           |
| MCF7      | tanespimycin | 10             | <a href="http://c3.lincsccloud.org/~user165/mar23/my_analysis.sig_quest_tool.2016032314335591/query_result/tail.result_WTCS_POL001_MCF7_24H_BRD-A61304759_10_n2000.html">http://c3.lincsccloud.org/~user165/mar23/my_analysis.sig_quest_tool.2016032314335591/query_result/tail.result_WTCS_POL001_MCF7_24H_BRD-A61304759_10_n2000.html</a>               |
| PC3       | tanespimycin | 10             | <a href="http://c3.lincsccloud.org/~user165/mar23/my_analysis.sig_quest_tool.2016032314335591/query_result/tail.result_WTCS_POL001_PC3_24H_BRD-A61304759_10_n2000.html">http://c3.lincsccloud.org/~user165/mar23/my_analysis.sig_quest_tool.2016032314335591/query_result/tail.result_WTCS_POL001_PC3_24H_BRD-A61304759_10_n2000.html</a>                 |
| HEPG2     | tanespimycin | 3.33333        | <a href="http://c3.lincsccloud.org/~user165/mar23/my_analysis.sig_quest_tool.2016032314335591/query_result/tail.result_WTCS_POL001_HEPG2_24H_BRD-A61304759_3.33333_n2000.html">http://c3.lincsccloud.org/~user165/mar23/my_analysis.sig_quest_tool.2016032314335591/query_result/tail.result_WTCS_POL001_HEPG2_24H_BRD-A61304759_3.33333_n2000.html</a>   |
| HT29      | tanespimycin | 3.33333        | <a href="http://c3.lincsccloud.org/~user165/mar23/my_analysis.sig_quest_tool.2016032314335591/query_result/tail.result_WTCS_POL001_HT29_24H_BRD-A61304759_3.33333_n2000.html">http://c3.lincsccloud.org/~user165/mar23/my_analysis.sig_quest_tool.2016032314335591/query_result/tail.result_WTCS_POL001_HT29_24H_BRD-A61304759_3.33333_n2000.html</a>     |
| JURKAT    | tanespimycin | 3.33333        | <a href="http://c3.lincsccloud.org/~user165/mar23/my_analysis.sig_quest_tool.2016032314335591/query_result/tail.result_WTCS_POL001_JURKAT_24H_BRD-A61304759_3.33333_n2000.html">http://c3.lincsccloud.org/~user165/mar23/my_analysis.sig_quest_tool.2016032314335591/query_result/tail.result_WTCS_POL001_JURKAT_24H_BRD-A61304759_3.33333_n2000.html</a> |
| MCF7      | tanespimycin | 3.33333        | <a href="http://c3.lincsccloud.org/~user165/mar23/my_analysis.sig_quest_tool.2016032314335591/query_result/tail.result_WTCS_POL001_MCF7_24H_BRD-A61304759_3.33333_n2000.html">http://c3.lincsccloud.org/~user165/mar23/my_analysis.sig_quest_tool.2016032314335591/query_result/tail.result_WTCS_POL001_MCF7_24H_BRD-A61304759_3.33333_n2000.html</a>     |
| PC3       | tanespimycin | 3.33333        | <a href="http://c3.lincsccloud.org/~user165/mar23/my_analysis.sig_quest_tool.2016032314335591/query_result/tail.result_WTCS_POL001_PC3_24H_BRD-A61304759_3.33333_n2000.html">http://c3.lincsccloud.org/~user165/mar23/my_analysis.sig_quest_tool.2016032314335591/query_result/tail.result_WTCS_POL001_PC3_24H_BRD-A61304759_3.33333_n2000.html</a>       |
| HEPG2     | tanespimycin | 1.11111        | <a href="http://c3.lincsccloud.org/~user165/mar23/my_analysis.sig_quest_tool.2016032314335591/query_result/tail.result_WTCS_POL001_HEPG2_24H_BRD-A61304759_1.11111_n2000.html">http://c3.lincsccloud.org/~user165/mar23/my_analysis.sig_quest_tool.2016032314335591/query_result/tail.result_WTCS_POL001_HEPG2_24H_BRD-A61304759_1.11111_n2000.html</a>   |
| HT29      | tanespimycin | 1.11111        | <a href="http://c3.lincsccloud.org/~user165/mar23/my_analysis.sig_quest_tool.2016032314335591/query_result/tail.result_WTCS_POL001_HT29_24H_BRD-A61304759_1.11111_n2000.html">http://c3.lincsccloud.org/~user165/mar23/my_analysis.sig_quest_tool.2016032314335591/query_result/tail.result_WTCS_POL001_HT29_24H_BRD-A61304759_1.11111_n2000.html</a>     |
| JURKAT    | tanespimycin | 1.11111        | <a href="http://c3.lincsccloud.org/~user165/mar23/my_analysis.sig_quest_tool.2016032314335591/query_result/tail.result_WTCS_POL001_JURKAT_24H_BRD-A61304759_1.11111_n2000.html">http://c3.lincsccloud.org/~user165/mar23/my_analysis.sig_quest_tool.2016032314335591/query_result/tail.result_WTCS_POL001_JURKAT_24H_BRD-A61304759_1.11111_n2000.html</a> |
| MCF7      | tanespimycin | 1.11111        | <a href="http://c3.lincsccloud.org/~user165/mar23/my_analysis.sig_quest_tool.2016032314335591/query_result/tail.result_WTCS_POL001_MCF7_24H_BRD-A61304759_1.11111_n2000.html">http://c3.lincsccloud.org/~user165/mar23/my_analysis.sig_quest_tool.2016032314335591/query_result/tail.result_WTCS_POL001_MCF7_24H_BRD-A61304759_1.11111_n2000.html</a>     |
| PC3       | tanespimycin | 1.11111        | <a href="http://c3.lincsccloud.org/~user165/mar23/my_analysis.sig_quest_tool.2016032314335591/query_result/tail.result_WTCS_POL001_PC3_24H_BRD-A61304759_1.11111_n2000.html">http://c3.lincsccloud.org/~user165/mar23/my_analysis.sig_quest_tool.2016032314335591/query_result/tail.result_WTCS_POL001_PC3_24H_BRD-A61304759_1.11111_n2000.html</a>       |
| HEPG2     | tanespimycin | 0.37037        | <a href="http://c3.lincsccloud.org/~user165/mar23/my_analysis.sig_quest_tool.2016032314335591/query_result/tail.result_WTCS_POL001_HEPG2_24H_BRD-A61304759_0.37037_n2000.html">http://c3.lincsccloud.org/~user165/mar23/my_analysis.sig_quest_tool.2016032314335591/query_result/tail.result_WTCS_POL001_HEPG2_24H_BRD-A61304759_0.37037_n2000.html</a>   |

|        |              |          |                                                                                                                                                                                                                                                                                                                                                               |
|--------|--------------|----------|---------------------------------------------------------------------------------------------------------------------------------------------------------------------------------------------------------------------------------------------------------------------------------------------------------------------------------------------------------------|
|        |              |          | <a href="http://c3.lincsccloud.org/~user165/mar23/my_analysis.sig_quest_tool.2016032314335591/query_result/tail.result_WTCS_POL001_HEPG2_24H_BRD-A61304759_0.37037_n2000.html">032314335591/query_result/tail.result_WTCS_POL001_HEPG2_24H_BRD-A61304759_0.37037_n2000.html</a>                                                                               |
| HT29   | tanespimycin | 0.37037  | <a href="http://c3.lincsccloud.org/~user165/mar23/my_analysis.sig_quest_tool.2016032314335591/query_result/tail.result_WTCS_POL001_HT29_24H_BRD-A61304759_0.37037_n2000.html">http://c3.lincsccloud.org/~user165/mar23/my_analysis.sig_quest_tool.2016032314335591/query_result/tail.result_WTCS_POL001_HT29_24H_BRD-A61304759_0.37037_n2000.html</a>         |
| JURKAT | tanespimycin | 0.37037  | <a href="http://c3.lincsccloud.org/~user165/mar23/my_analysis.sig_quest_tool.2016032314335591/query_result/tail.result_WTCS_POL001_JURKAT_24H_BRD-A61304759_0.37037_n2000.html">http://c3.lincsccloud.org/~user165/mar23/my_analysis.sig_quest_tool.2016032314335591/query_result/tail.result_WTCS_POL001_JURKAT_24H_BRD-A61304759_0.37037_n2000.html</a>     |
| MCF7   | tanespimycin | 0.37037  | <a href="http://c3.lincsccloud.org/~user165/mar23/my_analysis.sig_quest_tool.2016032314335591/query_result/tail.result_WTCS_POL001_MCF7_24H_BRD-A61304759_0.37037_n2000.html">http://c3.lincsccloud.org/~user165/mar23/my_analysis.sig_quest_tool.2016032314335591/query_result/tail.result_WTCS_POL001_MCF7_24H_BRD-A61304759_0.37037_n2000.html</a>         |
| PC3    | tanespimycin | 0.37037  | <a href="http://c3.lincsccloud.org/~user165/mar23/my_analysis.sig_quest_tool.2016032314335591/query_result/tail.result_WTCS_POL001_PC3_24H_BRD-A61304759_0.37037_n2000.html">http://c3.lincsccloud.org/~user165/mar23/my_analysis.sig_quest_tool.2016032314335591/query_result/tail.result_WTCS_POL001_PC3_24H_BRD-A61304759_0.37037_n2000.html</a>           |
| HEPG2  | tanespimycin | 0.123457 | <a href="http://c3.lincsccloud.org/~user165/mar23/my_analysis.sig_quest_tool.2016032314335591/query_result/tail.result_WTCS_POL001_HEPG2_24H_BRD-A61304759_0.123457_n2000.html">http://c3.lincsccloud.org/~user165/mar23/my_analysis.sig_quest_tool.2016032314335591/query_result/tail.result_WTCS_POL001_HEPG2_24H_BRD-A61304759_0.123457_n2000.html</a>     |
| HT29   | tanespimycin | 0.123457 | <a href="http://c3.lincsccloud.org/~user165/mar23/my_analysis.sig_quest_tool.2016032314335591/query_result/tail.result_WTCS_POL001_HT29_24H_BRD-A61304759_0.123457_n2000.html">http://c3.lincsccloud.org/~user165/mar23/my_analysis.sig_quest_tool.2016032314335591/query_result/tail.result_WTCS_POL001_HT29_24H_BRD-A61304759_0.123457_n2000.html</a>       |
| JURKAT | tanespimycin | 0.123457 | <a href="http://c3.lincsccloud.org/~user165/mar23/my_analysis.sig_quest_tool.2016032314335591/query_result/tail.result_WTCS_POL001_JURKAT_24H_BRD-A61304759_0.123457_n2000.html">http://c3.lincsccloud.org/~user165/mar23/my_analysis.sig_quest_tool.2016032314335591/query_result/tail.result_WTCS_POL001_JURKAT_24H_BRD-A61304759_0.123457_n2000.html</a>   |
| MCF7   | tanespimycin | 0.123457 | <a href="http://c3.lincsccloud.org/~user165/mar23/my_analysis.sig_quest_tool.2016032314335591/query_result/tail.result_WTCS_POL001_MCF7_24H_BRD-A61304759_0.123457_n2000.html">http://c3.lincsccloud.org/~user165/mar23/my_analysis.sig_quest_tool.2016032314335591/query_result/tail.result_WTCS_POL001_MCF7_24H_BRD-A61304759_0.123457_n2000.html</a>       |
| PC3    | tanespimycin | 0.123457 | <a href="http://c3.lincsccloud.org/~user165/mar23/my_analysis.sig_quest_tool.2016032314335591/query_result/tail.result_WTCS_POL001_PC3_24H_BRD-A61304759_0.123457_n2000.html">http://c3.lincsccloud.org/~user165/mar23/my_analysis.sig_quest_tool.2016032314335591/query_result/tail.result_WTCS_POL001_PC3_24H_BRD-A61304759_0.123457_n2000.html</a>         |
| HEPG2  | tanespimycin | 0.041152 | <a href="http://c3.lincsccloud.org/~user165/mar23/my_analysis.sig_quest_tool.2016032314335591/query_result/tail.result_WTCS_POL001_HEPG2_24H_BRD-A61304759_0.0411523_n2000.html">http://c3.lincsccloud.org/~user165/mar23/my_analysis.sig_quest_tool.2016032314335591/query_result/tail.result_WTCS_POL001_HEPG2_24H_BRD-A61304759_0.0411523_n2000.html</a>   |
| HT29   | tanespimycin | 0.041152 | <a href="http://c3.lincsccloud.org/~user165/mar23/my_analysis.sig_quest_tool.2016032314335591/query_result/tail.result_WTCS_POL001_HT29_24H_BRD-A61304759_0.0411523_n2000.html">http://c3.lincsccloud.org/~user165/mar23/my_analysis.sig_quest_tool.2016032314335591/query_result/tail.result_WTCS_POL001_HT29_24H_BRD-A61304759_0.0411523_n2000.html</a>     |
| JURKAT | tanespimycin | 0.041152 | <a href="http://c3.lincsccloud.org/~user165/mar23/my_analysis.sig_quest_tool.2016032314335591/query_result/tail.result_WTCS_POL001_JURKAT_24H_BRD-A61304759_0.0411523_n2000.html">http://c3.lincsccloud.org/~user165/mar23/my_analysis.sig_quest_tool.2016032314335591/query_result/tail.result_WTCS_POL001_JURKAT_24H_BRD-A61304759_0.0411523_n2000.html</a> |
| MCF7   | tanespimycin | 0.041152 | <a href="http://c3.lincsccloud.org/~user165/mar23/my_analysis.sig_quest_tool.2016032314335591/query_result/tail.result_WTCS_POL001_MCF7_24H_BRD-A61304759_0.0411523_n2000.html">http://c3.lincsccloud.org/~user165/mar23/my_analysis.sig_quest_tool.2016032314335591/query_result/tail.result_WTCS_POL001_MCF7_24H_BRD-A61304759_0.0411523_n2000.html</a>     |
| PC3    | tanespimycin | 0.041152 | <a href="http://c3.lincsccloud.org/~user165/mar23/my_analysis.sig_quest_tool.2016032314335591/query_result/tail.result_WTCS_POL001_PC3_24H_BRD-A61304759_0.0411523_n2000.html">http://c3.lincsccloud.org/~user165/mar23/my_analysis.sig_quest_tool.2016032314335591/query_result/tail.result_WTCS_POL001_PC3_24H_BRD-A61304759_0.0411523_n2000.html</a>       |
| HEPG2  | JG-98        | 5        | <a href="http://c3.lincsccloud.org/~user165/mar23/my_analysis.sig_quest_tool.2016032314335591/query_result/tail.result_WTCS_POL001_HEPG2_24H_BRD-U06877554_5_n2000.html">http://c3.lincsccloud.org/~user165/mar23/my_analysis.sig_quest_tool.2016032314335591/query_result/tail.result_WTCS_POL001_HEPG2_24H_BRD-U06877554_5_n2000.html</a>                   |
| HT29   | JG-98        | 5        | <a href="http://c3.lincsccloud.org/~user165/mar23/my_analysis.sig_quest_tool.2016032314335591/query_result/tail.result_WTCS_POL001_HT29_24H_BRD-U06877554_5_n2000.html">http://c3.lincsccloud.org/~user165/mar23/my_analysis.sig_quest_tool.2016032314335591/query_result/tail.result_WTCS_POL001_HT29_24H_BRD-U06877554_5_n2000.html</a>                     |
| JURKAT | JG-98        | 5        | <a href="http://c3.lincsccloud.org/~user165/mar23/my_analysis.sig_quest_tool.2016032314335591/query_result/tail.result_WTCS_POL001_JURKAT_24H_BRD">http://c3.lincsccloud.org/~user165/mar23/my_analysis.sig_quest_tool.2016032314335591/query_result/tail.result_WTCS_POL001_JURKAT_24H_BRD</a>                                                               |

|        |       |          |                                                                                                                                                                                                                                                                                                                                                             |
|--------|-------|----------|-------------------------------------------------------------------------------------------------------------------------------------------------------------------------------------------------------------------------------------------------------------------------------------------------------------------------------------------------------------|
|        |       |          | <a href="#">-U06877554_5_n2000.html</a>                                                                                                                                                                                                                                                                                                                     |
| MCF7   | JG-98 | 5        | <a href="http://c3.lincsccloud.org/~user165/mar23/my_analysis.sig_quest_tool.2016032314335591/query_result/tail.result_WTCS_POL001_MCF7_24H_BRD-U06877554_5_n2000.html">http://c3.lincsccloud.org/~user165/mar23/my_analysis.sig_quest_tool.2016032314335591/query_result/tail.result_WTCS_POL001_MCF7_24H_BRD-U06877554_5_n2000.html</a>                   |
| PC3    | JG-98 | 5        | <a href="http://c3.lincsccloud.org/~user165/mar23/my_analysis.sig_quest_tool.2016032314335591/query_result/tail.result_WTCS_POL001_PC3_24H_BRD-U06877554_5_n2000.html">http://c3.lincsccloud.org/~user165/mar23/my_analysis.sig_quest_tool.2016032314335591/query_result/tail.result_WTCS_POL001_PC3_24H_BRD-U06877554_5_n2000.html</a>                     |
| HEPG2  | JG-98 | 1.66667  | <a href="http://c3.lincsccloud.org/~user165/mar23/my_analysis.sig_quest_tool.2016032314335591/query_result/tail.result_WTCS_POL001_HEPG2_24H_BRD-U06877554_1.66667_n2000.html">http://c3.lincsccloud.org/~user165/mar23/my_analysis.sig_quest_tool.2016032314335591/query_result/tail.result_WTCS_POL001_HEPG2_24H_BRD-U06877554_1.66667_n2000.html</a>     |
| HT29   | JG-98 | 1.66667  | <a href="http://c3.lincsccloud.org/~user165/mar23/my_analysis.sig_quest_tool.2016032314335591/query_result/tail.result_WTCS_POL001_HT29_24H_BRD-U06877554_1.66667_n2000.html">http://c3.lincsccloud.org/~user165/mar23/my_analysis.sig_quest_tool.2016032314335591/query_result/tail.result_WTCS_POL001_HT29_24H_BRD-U06877554_1.66667_n2000.html</a>       |
| JURKAT | JG-98 | 1.66667  | <a href="http://c3.lincsccloud.org/~user165/mar23/my_analysis.sig_quest_tool.2016032314335591/query_result/tail.result_WTCS_POL001_JURKAT_24H_BRD-U06877554_1.66667_n2000.html">http://c3.lincsccloud.org/~user165/mar23/my_analysis.sig_quest_tool.2016032314335591/query_result/tail.result_WTCS_POL001_JURKAT_24H_BRD-U06877554_1.66667_n2000.html</a>   |
| MCF7   | JG-98 | 1.66667  | <a href="http://c3.lincsccloud.org/~user165/mar23/my_analysis.sig_quest_tool.2016032314335591/query_result/tail.result_WTCS_POL001_MCF7_24H_BRD-U06877554_1.66667_n2000.html">http://c3.lincsccloud.org/~user165/mar23/my_analysis.sig_quest_tool.2016032314335591/query_result/tail.result_WTCS_POL001_MCF7_24H_BRD-U06877554_1.66667_n2000.html</a>       |
| PC3    | JG-98 | 1.66667  | <a href="http://c3.lincsccloud.org/~user165/mar23/my_analysis.sig_quest_tool.2016032314335591/query_result/tail.result_WTCS_POL001_PC3_24H_BRD-U06877554_1.66667_n2000.html">http://c3.lincsccloud.org/~user165/mar23/my_analysis.sig_quest_tool.2016032314335591/query_result/tail.result_WTCS_POL001_PC3_24H_BRD-U06877554_1.66667_n2000.html</a>         |
| HEPG2  | JG-98 | 0.555556 | <a href="http://c3.lincsccloud.org/~user165/mar23/my_analysis.sig_quest_tool.2016032314335591/query_result/tail.result_WTCS_POL001_HEPG2_24H_BRD-U06877554_0.555556_n2000.html">http://c3.lincsccloud.org/~user165/mar23/my_analysis.sig_quest_tool.2016032314335591/query_result/tail.result_WTCS_POL001_HEPG2_24H_BRD-U06877554_0.555556_n2000.html</a>   |
| HT29   | JG-98 | 0.555556 | <a href="http://c3.lincsccloud.org/~user165/mar23/my_analysis.sig_quest_tool.2016032314335591/query_result/tail.result_WTCS_POL001_HT29_24H_BRD-U06877554_0.555556_n2000.html">http://c3.lincsccloud.org/~user165/mar23/my_analysis.sig_quest_tool.2016032314335591/query_result/tail.result_WTCS_POL001_HT29_24H_BRD-U06877554_0.555556_n2000.html</a>     |
| JURKAT | JG-98 | 0.555556 | <a href="http://c3.lincsccloud.org/~user165/mar23/my_analysis.sig_quest_tool.2016032314335591/query_result/tail.result_WTCS_POL001_JURKAT_24H_BRD-U06877554_0.555556_n2000.html">http://c3.lincsccloud.org/~user165/mar23/my_analysis.sig_quest_tool.2016032314335591/query_result/tail.result_WTCS_POL001_JURKAT_24H_BRD-U06877554_0.555556_n2000.html</a> |
| MCF7   | JG-98 | 0.555556 | <a href="http://c3.lincsccloud.org/~user165/mar23/my_analysis.sig_quest_tool.2016032314335591/query_result/tail.result_WTCS_POL001_MCF7_24H_BRD-U06877554_0.555556_n2000.html">http://c3.lincsccloud.org/~user165/mar23/my_analysis.sig_quest_tool.2016032314335591/query_result/tail.result_WTCS_POL001_MCF7_24H_BRD-U06877554_0.555556_n2000.html</a>     |
| PC3    | JG-98 | 0.555556 | <a href="http://c3.lincsccloud.org/~user165/mar23/my_analysis.sig_quest_tool.2016032314335591/query_result/tail.result_WTCS_POL001_PC3_24H_BRD-U06877554_0.555556_n2000.html">http://c3.lincsccloud.org/~user165/mar23/my_analysis.sig_quest_tool.2016032314335591/query_result/tail.result_WTCS_POL001_PC3_24H_BRD-U06877554_0.555556_n2000.html</a>       |
| HEPG2  | JG-98 | 0.185185 | <a href="http://c3.lincsccloud.org/~user165/mar23/my_analysis.sig_quest_tool.2016032314335591/query_result/tail.result_WTCS_POL001_HEPG2_24H_BRD-U06877554_0.185185_n2000.html">http://c3.lincsccloud.org/~user165/mar23/my_analysis.sig_quest_tool.2016032314335591/query_result/tail.result_WTCS_POL001_HEPG2_24H_BRD-U06877554_0.185185_n2000.html</a>   |
| HT29   | JG-98 | 0.185185 | <a href="http://c3.lincsccloud.org/~user165/mar23/my_analysis.sig_quest_tool.2016032314335591/query_result/tail.result_WTCS_POL001_HT29_24H_BRD-U06877554_0.185185_n2000.html">http://c3.lincsccloud.org/~user165/mar23/my_analysis.sig_quest_tool.2016032314335591/query_result/tail.result_WTCS_POL001_HT29_24H_BRD-U06877554_0.185185_n2000.html</a>     |
| JURKAT | JG-98 | 0.185185 | <a href="http://c3.lincsccloud.org/~user165/mar23/my_analysis.sig_quest_tool.2016032314335591/query_result/tail.result_WTCS_POL001_JURKAT_24H_BRD-U06877554_0.185185_n2000.html">http://c3.lincsccloud.org/~user165/mar23/my_analysis.sig_quest_tool.2016032314335591/query_result/tail.result_WTCS_POL001_JURKAT_24H_BRD-U06877554_0.185185_n2000.html</a> |
| MCF7   | JG-98 | 0.185185 | <a href="http://c3.lincsccloud.org/~user165/mar23/my_analysis.sig_quest_tool.2016032314335591/query_result/tail.result_WTCS_POL001_MCF7_24H_BRD-U06877554_0.185185_n2000.html">http://c3.lincsccloud.org/~user165/mar23/my_analysis.sig_quest_tool.2016032314335591/query_result/tail.result_WTCS_POL001_MCF7_24H_BRD-U06877554_0.185185_n2000.html</a>     |
| PC3    | JG-98 | 0.185185 | <a href="http://c3.lincsccloud.org/~user165/mar23/my_analysis.sig_quest_tool.2016032314335591/query_result/tail.result_WTCS_POL001_PC3_24H_BRD-U06877554_0.185185_n2000.html">http://c3.lincsccloud.org/~user165/mar23/my_analysis.sig_quest_tool.2016032314335591/query_result/tail.result_WTCS_POL001_PC3_24H_BRD-U06877554_0.185185_n2000.html</a>       |



|        |       |          |                                                                                                                                                                                                                                                                                                                                                               |
|--------|-------|----------|---------------------------------------------------------------------------------------------------------------------------------------------------------------------------------------------------------------------------------------------------------------------------------------------------------------------------------------------------------------|
| HEPG2  | JG-98 | 0.061728 | <a href="http://c3.lincsccloud.org/~user165/mar23/my_analysis.sig_quest_tool.2016032314335591/query_result/tail.result_WTCS_POL001_HEPG2_24H_BRD-U06877554_0.0617284_n2000.html">http://c3.lincsccloud.org/~user165/mar23/my_analysis.sig_quest_tool.2016032314335591/query_result/tail.result_WTCS_POL001_HEPG2_24H_BRD-U06877554_0.0617284_n2000.html</a>   |
| HT29   | JG-98 | 0.061728 | <a href="http://c3.lincsccloud.org/~user165/mar23/my_analysis.sig_quest_tool.2016032314335591/query_result/tail.result_WTCS_POL001_HT29_24H_BRD-U06877554_0.0617284_n2000.html">http://c3.lincsccloud.org/~user165/mar23/my_analysis.sig_quest_tool.2016032314335591/query_result/tail.result_WTCS_POL001_HT29_24H_BRD-U06877554_0.0617284_n2000.html</a>     |
| JURKAT | JG-98 | 0.061728 | <a href="http://c3.lincsccloud.org/~user165/mar23/my_analysis.sig_quest_tool.2016032314335591/query_result/tail.result_WTCS_POL001_JURKAT_24H_BRD-U06877554_0.0617284_n2000.html">http://c3.lincsccloud.org/~user165/mar23/my_analysis.sig_quest_tool.2016032314335591/query_result/tail.result_WTCS_POL001_JURKAT_24H_BRD-U06877554_0.0617284_n2000.html</a> |
| MCF7   | JG-98 | 0.061728 | <a href="http://c3.lincsccloud.org/~user165/mar23/my_analysis.sig_quest_tool.2016032314335591/query_result/tail.result_WTCS_POL001_MCF7_24H_BRD-U06877554_0.0617284_n2000.html">http://c3.lincsccloud.org/~user165/mar23/my_analysis.sig_quest_tool.2016032314335591/query_result/tail.result_WTCS_POL001_MCF7_24H_BRD-U06877554_0.0617284_n2000.html</a>     |
| PC3    | JG-98 | 0.061728 | <a href="http://c3.lincsccloud.org/~user165/mar23/my_analysis.sig_quest_tool.2016032314335591/query_result/tail.result_WTCS_POL001_PC3_24H_BRD-U06877554_0.0617284_n2000.html">http://c3.lincsccloud.org/~user165/mar23/my_analysis.sig_quest_tool.2016032314335591/query_result/tail.result_WTCS_POL001_PC3_24H_BRD-U06877554_0.0617284_n2000.html</a>       |
| HEPG2  | JG-98 | 0.020576 | <a href="http://c3.lincsccloud.org/~user165/mar23/my_analysis.sig_quest_tool.2016032314335591/query_result/tail.result_WTCS_POL001_HEPG2_24H_BRD-U06877554_0.0205761_n2000.html">http://c3.lincsccloud.org/~user165/mar23/my_analysis.sig_quest_tool.2016032314335591/query_result/tail.result_WTCS_POL001_HEPG2_24H_BRD-U06877554_0.0205761_n2000.html</a>   |
| HT29   | JG-98 | 0.020576 | <a href="http://c3.lincsccloud.org/~user165/mar23/my_analysis.sig_quest_tool.2016032314335591/query_result/tail.result_WTCS_POL001_HT29_24H_BRD-U06877554_0.0205761_n2000.html">http://c3.lincsccloud.org/~user165/mar23/my_analysis.sig_quest_tool.2016032314335591/query_result/tail.result_WTCS_POL001_HT29_24H_BRD-U06877554_0.0205761_n2000.html</a>     |
| JURKAT | JG-98 | 0.020576 | <a href="http://c3.lincsccloud.org/~user165/mar23/my_analysis.sig_quest_tool.2016032314335591/query_result/tail.result_WTCS_POL001_JURKAT_24H_BRD-U06877554_0.0205761_n2000.html">http://c3.lincsccloud.org/~user165/mar23/my_analysis.sig_quest_tool.2016032314335591/query_result/tail.result_WTCS_POL001_JURKAT_24H_BRD-U06877554_0.0205761_n2000.html</a> |
| MCF7   | JG-98 | 0.020576 | <a href="http://c3.lincsccloud.org/~user165/mar23/my_analysis.sig_quest_tool.2016032314335591/query_result/tail.result_WTCS_POL001_MCF7_24H_BRD-U06877554_0.0205761_n2000.html">http://c3.lincsccloud.org/~user165/mar23/my_analysis.sig_quest_tool.2016032314335591/query_result/tail.result_WTCS_POL001_MCF7_24H_BRD-U06877554_0.0205761_n2000.html</a>     |
| PC3    | JG-98 | 0.020576 | <a href="http://c3.lincsccloud.org/~user165/mar23/my_analysis.sig_quest_tool.2016032314335591/query_result/tail.result_WTCS_POL001_PC3_24H_BRD-U06877554_0.0205761_n2000.html">http://c3.lincsccloud.org/~user165/mar23/my_analysis.sig_quest_tool.2016032314335591/query_result/tail.result_WTCS_POL001_PC3_24H_BRD-U06877554_0.0205761_n2000.html</a>       |

**Table S2, S3. GSEA report showing pathways that are significantly upregulated (S2) or downregulated (S3) in response of MCF7 cells to JG- 98.** MCF7 cells were treated with 2 $\mu$ M of JG-98 for 36 hours. RNA was isolated and submitted for microarray analysis. Microarray data were analyzed using the Broad Institute software package for gene set enrichment analysis (GSEA) in Boston University Center for Translational Research.

Table S2 downregulated pathways

| NAME                                                                       | SIZE | FDR q-val | FWER p-val |
|----------------------------------------------------------------------------|------|-----------|------------|
| REACTOME_DNA_REPLICATION                                                   | 182  | 0         | 0          |
| REACTOME_CELL_CYCLE                                                        | 383  | 0         | 0          |
| REACTOME_CELL_CYCLE_MITOTIC                                                | 301  | 0         | 0          |
| REACTOME_MITOTIC_M_M_G1_PHASES                                             | 162  | 0         | 0          |
| REACTOME_CHROMOSOME_MAINTENANCE                                            | 108  | 0         | 0          |
| REACTOME_S_PHASE                                                           | 103  | 0         | 0          |
| SGCGSSAAA_V\$E2F1DP2_01                                                    | 164  | 0         | 0          |
| REACTOME_TELOMERE_MAINTENANCE                                              | 65   | 0         | 0          |
| REACTOME_G1_S_TRANSITION                                                   | 103  | 0         | 0          |
| REACTOME_DEPOSITION_OF_NEW_CENPA_CONTAINING_NUCL EOSOMES_AT_THE_CENTROMERE | 53   | 0         | 0          |
| REACTOME_SYNTHESIS_OF_DNA                                                  | 87   | 0         | 0          |
| REACTOME_MITOTIC_G1_G1_S_PHASES                                            | 127  | 0         | 0          |
| V\$E2F1_Q6                                                                 | 229  | 0         | 0          |
| V\$E2F4DP2_01                                                              | 230  | 0         | 0          |
| V\$E2F1DP2_01                                                              | 230  | 0         | 0          |
| V\$E2F4DP1_01                                                              | 235  | 0         | 0          |
| REACTOME_PROCESSING_OF_CAPPED_INTRON_CONTAINING_PRE_MRNA                   | 130  | 0         | 0          |
| V\$E2F1DP1_01                                                              | 230  | 0         | 0          |
| REACTOME_DNA_STRAND_ELONGATION                                             | 29   | 0         | 0          |
| V\$E2F_02                                                                  | 230  | 0         | 0          |
| REACTOME_ACTIVATION_OF_ATR_IN_RESPONSE_TO_REPLICATI ON_STRESS              | 35   | 0         | 0          |
| KEGG_DNA_REPLICATION                                                       | 35   | 0         | 0          |
| REACTOME_M_G1_TRANSITION                                                   | 75   | 0         | 0          |
| V\$E2F1_Q3                                                                 | 240  | 0         | 0          |
| V\$E2F_Q6                                                                  | 227  | 0         | 0          |
| REACTOME_MRNA_SPLICING                                                     | 102  | 0         | 0          |
| REACTOME_ACTIVATION_OF_THE_PRE_REPLICATIVE_COMPLEX                         | 29   | 0         | 0          |
| REACTOME_G2_M_CHECKPOINTS                                                  | 41   | 0         | 0          |
| REACTOME_MRNA_PROCESSING                                                   | 148  | 0         | 0          |
| V\$E2F1DP1RB_01                                                            | 225  | 0         | 0          |
| V\$E2F_Q4                                                                  | 229  | 0         | 0          |
| REACTOME_MITOTIC_PROMETAPHASE                                              | 83   | 0         | 0          |
| REACTOME_EXTENSION_OF_TELOMERES                                            | 26   | 0         | 0          |
| REACTOME_CELL_CYCLE_CHECKPOINTS                                            | 109  | 0         | 0          |

|                                                                                                                           |     |   |   |
|---------------------------------------------------------------------------------------------------------------------------|-----|---|---|
| V\$E2F_Q3                                                                                                                 | 222 | 0 | 0 |
| REACTOME_E2F_MEDIATED_REGULATION_OF_DNA_REPLICATION                                                                       | 32  | 0 | 0 |
| REACTOME_RNA_POL_I_PROMOTER_OPENING                                                                                       | 47  | 0 | 0 |
| REACTOME_ASSEMBLY_OF_THE_PRE_REPLICATIVE_COMPLEX                                                                          | 61  | 0 | 0 |
| CHROMOSOME                                                                                                                | 120 | 0 | 0 |
| V\$E2F_Q3                                                                                                                 | 236 | 0 | 0 |
| V\$E2F1_Q6_01                                                                                                             | 232 | 0 | 0 |
| CHROMOSOMAL_PART                                                                                                          | 94  | 0 | 0 |
| REACTOME_RNA_POL_I_RNA_POL_III_AND_MITOCHONDRIAL_TRANSCRIPTION                                                            | 103 | 0 | 0 |
| KEGG_OXIDATIVE_PHOSPHORYLATION                                                                                            | 111 | 0 | 0 |
| REACTOME_RNA_POL_I_TRANSCRIPTION                                                                                          | 70  | 0 | 0 |
| REACTOME_TRANSCRIPTION                                                                                                    | 186 | 0 | 0 |
| REACTOME_TCA_CYCLE_AND_RESPIRATORY_ELECTRON_TRANSPORT                                                                     | 112 | 0 | 0 |
| V\$E2F_Q3_01                                                                                                              | 229 | 0 | 0 |
| REACTOME_RESPIRATORY_ELECTRON_TRANSPORT_ATP_SYNTHESIS_BY_CHEMIOSMOTIC_COUPLING_AND_HEAT_PRODUCTION_BY_UNCOUPLING_PROTEINS | 76  | 0 | 0 |
| V\$E2F_Q4_01                                                                                                              | 232 | 0 | 0 |
| RNA_SPLICING                                                                                                              | 88  | 0 | 0 |
| KRCTCNNNNMANAGC_UNKNOWN                                                                                                   | 61  | 0 | 0 |
| REACTOME_CHOLESTEROL_BIOSYNTHESIS                                                                                         | 21  | 0 | 0 |
| KEGG_SPLICEOSOME                                                                                                          | 121 | 0 | 0 |
| V\$E2F_Q6_01                                                                                                              | 234 | 0 | 0 |
| BIOCARTA_MCM_PATHWAY                                                                                                      | 18  | 0 | 0 |
| V\$E2F1_Q4_01                                                                                                             | 222 | 0 | 0 |
| REACTOME_ORC1_REMOVAL_FROM_CHROMATIN                                                                                      | 63  | 0 | 0 |
| REACTOME_LAGGING_STRAND_SYNTHESIS                                                                                         | 18  | 0 | 0 |
| MRNA_PROCESSING_GO_0006397                                                                                                | 70  | 0 | 0 |
| KEGG_PARKINSONS_DISEASE                                                                                                   | 107 | 0 | 0 |
| REACTOME_TRANSPORT_OF_MATURE_TRANSCRIPT_TO_CYTOSOL                                                                        | 52  | 0 | 0 |
| M_PHASE_OF_MITOTIC_CELL_CYCLE                                                                                             | 84  | 0 | 0 |
| M_PHASE                                                                                                                   | 113 | 0 | 0 |
| KEGG_CELL_CYCLE                                                                                                           | 124 | 0 | 0 |
| REACTOME_REGULATION_OF_MITOTIC_CELL_CYCLE                                                                                 | 74  | 0 | 0 |
| KEGG_SYSTEMIC_LUPUS_ERYTHEMATOSUS                                                                                         | 113 | 0 | 0 |
| REACTOME_G1_S_SPECIFIC_TRANSCRIPTION                                                                                      | 17  | 0 | 0 |
| REACTOME_MEIOTIC_RECOMBINATION                                                                                            | 70  | 0 | 0 |
| ORGANELLE_INNER_MEMBRANE                                                                                                  | 71  | 0 | 0 |
| RNA_PROCESSING                                                                                                            | 165 | 0 | 0 |
| RIBONUCLEOPROTEIN_COMPLEX                                                                                                 | 135 | 0 | 0 |
| REACTOME_AMYLOIDS                                                                                                         | 67  | 0 | 0 |
| REACTOME_MEIOSIS                                                                                                          | 98  | 0 | 0 |
| CONDENSED_CHROMOSOME                                                                                                      | 31  | 0 | 0 |
| REACTOME_RESPIRATORY_ELECTRON_TRANSPORT                                                                                   | 61  | 0 | 0 |
| REACTOME_MRNA_SPLICING_MINOR_PATHWAY                                                                                      | 41  | 0 | 0 |
| CELL_CYCLE_PROCESS                                                                                                        | 191 | 0 | 0 |

|                                                                                                                   |     |          |       |
|-------------------------------------------------------------------------------------------------------------------|-----|----------|-------|
| MITOSIS                                                                                                           | 81  | 0        | 0     |
| MITOTIC_CELL_CYCLE                                                                                                | 151 | 0        | 0     |
| MITOCHONDRIAL_INNER_MEMBRANE                                                                                      | 63  | 0        | 0     |
| VŞE2F_01                                                                                                          | 65  | 0        | 0     |
| CELL_CYCLE_PHASE                                                                                                  | 168 | 0        | 0     |
| REACTOME_METABOLISM_OF_NON_CODING_RNA                                                                             | 44  | 0        | 0     |
| REACTOME_MEIOTIC_SYNAPSIS                                                                                         | 62  | 0        | 0     |
| REACTOME_CLEAVAGE_OF_GROWING_TRANSCRIPT_IN_THE_TERMINATION_REGION                                                 | 41  | 0        | 0     |
| REPLICATION_FORK                                                                                                  | 18  | 0        | 0     |
| REACTOME_DESTABILIZATION_OF_MRNA_BY_AUF1_HNRNP_D0                                                                 | 47  | 0        | 0     |
| REACTOME_FORMATION_OF_TUBULIN_FOLDING_INTERMEDIATES_BY_CCT_TRIC                                                   | 20  | 0        | 0     |
| KEGG_STEROID_BIOSYNTHESIS                                                                                         | 16  | 0        | 0     |
| KEGG_GLYCOLYSIS_GLUONEOGENESIS                                                                                    | 60  | 0        | 0     |
| REACTOME_CDT1_ASSOCIATION_WITH_THE_CDC6_ORC_ORIGIN_COMPLEX                                                        | 52  | 0        | 0     |
| REACTOME_PACKAGING_OF_TELOMERE_ENDS                                                                               | 39  | 0        | 0     |
| NUCLEAR_CHROMOSOME                                                                                                | 54  | 0        | 0     |
| CHROMOSOMEPERICENTRIC_REGION                                                                                      | 30  | 9.70E-06 | 0.001 |
| RRNA_METABOLIC_PROCESS                                                                                            | 16  | 9.60E-06 | 0.001 |
| REACTOME_GLYCOLYSIS                                                                                               | 26  | 9.50E-06 | 0.001 |
| KEGG_OOCYTE_MEIOSIS                                                                                               | 111 | 1.91E-05 | 0.002 |
| REACTOME_CYCLIN_A_B1_ASSOCIATED_EVENTS_DURING_G2_M_TRANSITION                                                     | 15  | 1.89E-05 | 0.002 |
| REACTOME_APC_C_CDC20_MEDIATED_DEGRADATION_OF_MITOTIC_PROTEINS                                                     | 62  | 1.87E-05 | 0.002 |
| REACTOME_MRNA_3_END_PROCESSING                                                                                    | 33  | 1.85E-05 | 0.002 |
| CHROMATIN                                                                                                         | 34  | 1.83E-05 | 0.002 |
| REACTOME_GLUONEOGENESIS                                                                                           | 30  | 4.60E-05 | 0.005 |
| CONDENSED_NUCLEAR_CHROMOSOME                                                                                      | 18  | 8.18E-05 | 0.009 |
| CELL_CYCLE_GO_0007049                                                                                             | 313 | 8.11E-05 | 0.009 |
| SPINDLE                                                                                                           | 39  | 8.03E-05 | 0.009 |
| REACTOME_CYCLIN_E_ASSOCIATED_EVENTS_DURING_G1_S_TRANSITION                                                        | 60  | 8.85E-05 | 0.01  |
| REACTOME_G0_AND_EARLY_G1                                                                                          | 23  | 8.77E-05 | 0.01  |
| REACTOME_POST_CHAPERONIN_TUBULIN_FOLDING_PATHWAY                                                                  | 17  | 9.53E-05 | 0.011 |
| REACTOME_DARPP_32_EVENTS                                                                                          | 24  | 9.44E-05 | 0.011 |
| MITOCHONDRIAL_PART                                                                                                | 136 | 9.36E-05 | 0.011 |
| DNA_REPLICATION                                                                                                   | 100 | 1.01E-04 | 0.012 |
| MRNA_METABOLIC_PROCESS                                                                                            | 81  | 1.00E-04 | 0.012 |
| MITOCHONDRIAL_MEMBRANE                                                                                            | 81  | 1.24E-04 | 0.015 |
| REACTOME_APC_C_CDH1_MEDIATED_DEGRADATION_OF_CDC20_AND_OTHER_APC_C_CDH1_TARGETED_PROTEINS_IN_LATE_MITOSIS_EARLY_G1 | 61  | 1.23E-04 | 0.015 |
| DNA_DEPENDENT_DNA_REPLICATION                                                                                     | 55  | 1.70E-04 | 0.021 |
| NUCLEOLAR_PART                                                                                                    | 18  | 1.77E-04 | 0.022 |
| REACTOME_GLUCOSE_METABOLISM                                                                                       | 63  | 1.75E-04 | 0.022 |
| MITOTIC_SISTER_CHROMATID_SEGREGATION                                                                              | 15  | 1.82E-04 | 0.023 |
| REACTOME_DNA_REPAIR                                                                                               | 102 | 2.20E-04 | 0.028 |

|                                                                         |     |          |       |
|-------------------------------------------------------------------------|-----|----------|-------|
| RRNA_PROCESSING                                                         | 15  | 2.34E-04 | 0.03  |
| KEGG_PROGESTERONE_MEDIATED_OOCYTE_MATURATION                            | 84  | 2.63E-04 | 0.034 |
| SPLICEOSOME                                                             | 48  | 2.83E-04 | 0.037 |
| STEROID_BIOSYNTHETIC_PROCESS                                            | 23  | 2.88E-04 | 0.038 |
| MITOCHONDRIAL_MEMBRANE_PART                                             | 49  | 3.01E-04 | 0.04  |
| KEGG_TERPENOID_BACKBONE_BIOSYNTHESIS                                    | 15  | 3.43E-04 | 0.046 |
| RIBONUCLEASE_ACTIVITY                                                   | 25  | 3.70E-04 | 0.05  |
| KEGG_BUTANOATE_METABOLISM                                               | 34  | 3.89E-04 | 0.053 |
| REACTOME_HOST_INTERACTIONS_OF_HIV_FACTORS                               | 116 | 4.58E-04 | 0.062 |
| MITOCHONDRIAL_ENVELOPE                                                  | 92  | 5.41E-04 | 0.074 |
| NUCLEAR_CHROMOSOME_PART                                                 | 34  | 5.80E-04 | 0.08  |
| REACTOME_HIV_INFECTION                                                  | 186 | 5.97E-04 | 0.082 |
| REACTOME_RNA_POL_II_TRANSCRIPTION                                       | 97  | 6.00E-04 | 0.083 |
| MITOCHONDRION                                                           | 331 | 6.09E-04 | 0.085 |
| REACTOME_HIV_LIFE_CYCLE                                                 | 109 | 6.40E-04 | 0.089 |
| KEGG_BASE_EXCISION_REPAIR                                               | 32  | 6.69E-04 | 0.094 |
| KEGG_MISMATCH_REPAIR                                                    | 23  | 6.64E-04 | 0.094 |
| ORGANELLE_ENVELOPE                                                      | 163 | 7.55E-04 | 0.108 |
| SMALL_NUCLEAR_RIBONUCLEOPROTEIN_COMPLEX                                 | 22  | 7.84E-04 | 0.112 |
| REACTOME_ABORTIVE_ELONGATION_OF_HIV1_TRANSCRIPT_IN_THE_ABSENCE_OF_TAT   | 23  | 8.39E-04 | 0.119 |
| LIPID_BIOSYNTHETIC_PROCESS                                              | 95  | 8.46E-04 | 0.12  |
| ENVELOPE                                                                | 163 | 8.60E-04 | 0.123 |
| REACTOME_SCFSKP2_MEDIATED_DEGRADATION_OF_P27_P21                        | 51  | 8.92E-04 | 0.129 |
| KEGG_PROTEASOME                                                         | 42  | 0.001024 | 0.147 |
| NUCLEOLUS                                                               | 122 | 0.001095 | 0.158 |
| REACTOME_TRANSPORT_OF_MATURE_MRNA_DERIVED_FROM_AN_INTRONLESS_TRANSCRIPT | 32  | 0.001133 | 0.164 |
| KEGG_PYRUVATE_METABOLISM                                                | 40  | 0.001138 | 0.165 |
| REACTOME_METABOLISM_OF_CARBOHYDRATES                                    | 230 | 0.001137 | 0.166 |
| CELL_CYCLE_CHECKPOINT_GO_0000075                                        | 48  | 0.001248 | 0.183 |
| KEGG_PENTOSE_PHOSPHATE_PATHWAY                                          | 27  | 0.001284 | 0.19  |
| REACTOME_CITRIC_ACID_CYCLE_TCA_CYCLE                                    | 18  | 0.001313 | 0.195 |
| KEGG_PYRIMIDINE_METABOLISM                                              | 94  | 0.001311 | 0.196 |
| REACTOME_TRANSCRIPTION_COUPLED_NER_TC_NER                               | 41  | 0.001302 | 0.196 |
| BIOCARTA_MPR_PATHWAY                                                    | 34  | 0.001324 | 0.2   |
| KEGG_VALINE_LEUCINE_AND_ISOLEUCINE_DEGRADATION                          | 44  | 0.001358 | 0.205 |
| KINETOCHORE                                                             | 24  | 0.001368 | 0.208 |
| DNA_METABOLIC_PROCESS                                                   | 251 | 0.001383 | 0.211 |
| SISTER_CHROMATID_SEGREGATION                                            | 16  | 0.001392 | 0.213 |
| REACTOME_MITOTIC_G2_G2_M_PHASES                                         | 78  | 0.001402 | 0.216 |
| REACTOME_GLOBAL_GENOMIC_NER_GG_NER                                      | 30  | 0.001393 | 0.216 |
| KEGG_FATTY_ACID_METABOLISM                                              | 40  | 0.001384 | 0.216 |
| CHROMATIN_BINDING                                                       | 32  | 0.001376 | 0.216 |
| REACTOME_KINESINS                                                       | 24  | 0.00173  | 0.262 |
| REACTOME_GLUCOSE_TRANSPORT                                              | 37  | 0.001737 | 0.265 |
| KEGG_NUCLEOTIDE_EXCISION_REPAIR                                         | 42  | 0.001772 | 0.272 |
| RIBOSOME_BIOGENESIS_AND_ASSEMBLY                                        | 18  | 0.001823 | 0.282 |
| KEGG_HOMOLOGOUS_RECOMBINATION                                           | 28  | 0.002083 | 0.316 |
| KTGGYRSGAA_UNKNOWN                                                      | 75  | 0.002104 | 0.321 |

|                                                               |     |          |       |
|---------------------------------------------------------------|-----|----------|-------|
| ALCOHOL_METABOLIC_PROCESS                                     | 86  | 0.002097 | 0.321 |
| REACTOME_FORMATION_OF_THE_HIV1_EARLY_ELONGATION_COMPLEX       | 31  | 0.002157 | 0.329 |
| KEGG_HUNTINGTONS_DISEASE                                      | 165 | 0.002155 | 0.331 |
| REACTOME_NEP_NS2_INTERACTS_WITH_THE_CELLULAR_EXPORT_MACHINERY | 26  | 0.002148 | 0.332 |
| REACTOME_CDK_MEDIATED_PHOSPHORYLATION_AND_REMOVAL_OF_CDC6     | 44  | 0.002218 | 0.343 |
| REACTOME_FATTY_ACYL_COA_BIOSYNTHESIS                          | 18  | 0.002281 | 0.349 |
| KEGG_PURINE_METABOLISM                                        | 155 | 0.002499 | 0.381 |
| REACTOME_NUCLEOTIDE_EXCISION_REPAIR                           | 46  | 0.002736 | 0.412 |

Table S3 upregulated pathways

| NAME                                                                              | FDR q-val | FWER p-val |
|-----------------------------------------------------------------------------------|-----------|------------|
| REACTOME_UNFOLDED_PROTEIN_RESPONSE                                                | 0         | 0          |
| REACTOME_BMAL1_CLOCK_NPAS2_ACTIVATES_CIRCADIAN_EXPRESSION                         | 0         | 0          |
| REACTOME_ACTIVATION_OF_CHAPERONE_GENES_BY_XBP1S                                   | 0         | 0          |
| REACTOME_DIABETES_PATHWAYS                                                        | 0         | 0          |
| REACTOME_CIRCADIAN_CLOCK                                                          | 0.013461  | 0.063      |
| V\$ATF6_01                                                                        | 0.02439   | 0.131      |
| REACTOME_RORA_ACTIVATES_CIRCADIAN_EXPRESSION                                      | 0.02454   | 0.154      |
| BIOCARTA_P53HYPOXIA_PATHWAY                                                       | 0.022521  | 0.161      |
| REACTOME_CIRCADIAN_REPRESSION_OF_EXPRESSION_BY_REV_ERBA                           | 0.020951  | 0.168      |
| REGULATION_OF_GTPASE_ACTIVITY                                                     | 0.024243  | 0.209      |
| TCTATGA,MIR-376A,MIR-376B                                                         | 0.07349   | 0.546      |
| BIOCARTA_PML_PATHWAY                                                              | 0.06763   | 0.547      |
| REACTOME_CYTOSOLIC_TRNA_AMINOACYLATION                                            | 0.068843  | 0.582      |
| REACTOME_PERK_REGULATED_GENE_EXPRESSION                                           | 0.065437  | 0.586      |
| ER_NUCLEAR_SIGNALING_PATHWAY                                                      | 0.068671  | 0.627      |
| KEGG_SNARE_INTERACTIONS_IN_VESICULAR_TRANSPORT                                    | 0.070436  | 0.662      |
| GOLGI_VESICLE_TRANSPORT                                                           | 0.068398  | 0.674      |
| REACTOME_ANTIGEN_PRESENTATION_FOLDING_ASSEMBLY_AND_PEPTIDE_LOADING_OF_CLASS_I_MHC | 0.067588  | 0.692      |
| REACTOME_CELL_JUNCTION_ORGANIZATION                                               | 0.072851  | 0.738      |

**Table S4. The list of genes that affect the response to JG-98 identified by the pooled shRNA screen in MCF7 and MDA-MB231 cells.**

Table S4

**MCF7**

| <b>Up Genes</b> | <b>Down Genes</b> |         |          |        |         |
|-----------------|-------------------|---------|----------|--------|---------|
| ACE             | ABCB7             | CYP1A2  | HSD17B4  | NR4A3  | RUNX3   |
| ACOT12          | ABCC1             | CYSLTR1 | HSF2     | NRG1   | RUVBL2  |
| ACVR1           | ABCC2             | DNAJA3  | HSP90AB1 | NT5C3  | RXRA    |
| ADH1C           | ACADVL            | DNAJB1  | HSPB1    | NUP214 | SC5DL   |
| AK1             | ADCY8             | DRD2    | HSPG2    | OCIAD1 | SF1     |
| APBB2           | ADRA1A            | DUSP4   | HTR1F    | OPRD1  | SIN3A   |
| ARF1            | AGRN              | DUSP6   | HTR2B    | OXTR   | SLC26A2 |
| ARFGAP3         | ALDH4A1           | EEF2    | HTR2C    | PAX8   | SMARCA4 |
| ATF2            | AMPD2             | EFTUD2  | HTR3B    | PCGF2  | SNRPA1  |
| ATG16L1         | ANP32A            | EIF1AX  | HTR3C    | PDHX   | SNRPD2  |
| ATP1A1          | APOBEC3G          | EIF2B5  | HTR4     | PGF    | SORBS1  |
| ATP5O           | AQR               | EIF2S2  | HYAL2    | PIK3CG | SP1     |
| ATP6V1E2        | ARFGEF2           | EIF3A   | IDH1     | PIK4CA | STRAP   |
| ATPGD1          | ATF3              | ELK4    | IGFBP6   | PITX2  | TACR1   |
| C1GALT1         | ATG4A             | EMR1    | IL10RB   | PLK1   | TBXA2R  |
| CACNA1B         | ATP6AP1           | EMR3    | IL1R1    | POLR2A | TCF7L1  |
| CACNA1H         | ATP6V1G1          | ERCC3   | IL22     | POLR2B | TCOF1   |
| CAMKK1          | ATRX              | ESRRA   | IRF6     | POLR2D | TEAD2   |
| CAPN10          | BAAT              | FBXW7   | IRF8     | POLR2F | TFCP2   |
| CD9             | BAP1              | FOXN1   | JUP      | POLR2I | TLE1    |
| CDKL2           | BMP10             | FOXO1   | KCNH7    | POR    | TNFSF4  |
| CHEK1           | BNIP3             | FZD3    | KIF11    | PROCR  | TNFSF8  |
| CMA1            | BPNT1             | FZD4    | KLRC4    | PSMA1  | TNIP1   |
| COL4A3          | C10RF103          | FZD7    | KLRK1    | PSMA2  | UBE2L3  |
| FOXK1           | C7                | GAD1    | KPNB1    | PSMA3  | USP9X   |
| GGT1            | C9ORF47           | GBX2    | KREMEN1  | PSMB2  | VNN1    |
| IFNA13          | CASK              | GCGR    | LAT2     | PSMB6  | WARS2   |
| IFNA16          | CBR1              | GGTL3   | LDLR     | PSMC2  | WWTR1   |
| INPP5D          | CCK               | GLP2R   | LHX2     | PSMD1  | YY1     |
| KCNJ3           | CCL28             | GNB2L1  | LPHN2    | PSMD2  |         |
| LHX8            | CCL3L1            | GPR109B | LRRK2    | PSMD3  |         |
| LOC400652       | CD58              | GPR35   | LY75     | PSMD6  |         |
| LPO             | CDA               | GPR37   | MAFK     | PTGDR  |         |
| MAP3K3          | CDC40             | GPR68   | MAML3    | PTGER3 |         |
| MYH2            | CDK5              | GPR81   | MAPK8IP3 | RAN    |         |
| PA2G4           | CDX4              | GRM5    | MBD1     | RBX1   |         |
| PIGM            | CHD8              | GTF2E2  | MC4R     | RECQL  |         |
| PRKCB1          | CLTC              | GTF3C3  | MCM2     | RPA2   |         |
| RAC1            | COL5A1            | GZMB    | MELK     | RPL10  |         |

|       |        |        |         |       |
|-------|--------|--------|---------|-------|
| RDH14 | COL5A2 | HNRNPC | MOG     | RPL11 |
| RENBP | CPO    | HNRPK  | MYL1    | RPL14 |
| SETD2 | CRY1   | HOXB4  | NACA    | RPL30 |
| SMAD2 | CSE1L  | HOXB6  | NCL     | RPL6  |
| SND1  | CSF2RA | HOXD13 | NEUROG3 | RPS13 |
| TNKS  | CXCR3  | HR     | NMI     | RTF1  |
| XPC   | CXCR6  | HRH4   | NR1D1   | RUNX2 |

### MDA-MB231

| <b>Up<br/>Genes</b> | <b>Down<br/>Genes</b> |           |         |           |
|---------------------|-----------------------|-----------|---------|-----------|
| ATP1A1              | ABCC1                 | EIF2B5    | PLA2G1B | SEC22B    |
| IKZF3               | ABCC2                 | EIF3A     | PLK1    | SERPINA10 |
|                     | AKR1C2                | EIF4EBP1  | POLR2A  | SHFM1     |
|                     | ALG11                 | EREG      | POLR2B  | SKP1A     |
|                     | ANAPC4                | FCGR3B    | POLR2D  | SLAIN1    |
|                     | AQR                   | FLT4      | POLR2F  | SMC6      |
|                     | ARD1A                 | GAPDH     | PON3    | SMN1      |
|                     | ATP1A4                | GBF1      | PPAP2B  | SNCB      |
|                     | ATP5G1                | GBX2      | PPP2R2A | SNRNP200  |
|                     | ATP6AP1               | GNA13     | PRDX2   | SNRPD2    |
|                     | ATP6V0C               | GPX4      | PRKCE   | SRP54     |
|                     | ATP6V0D1              | GSK3A     | PRKRA   | STAG2     |
|                     | ATP6V1A               | GSTA1     | PRODH   | STAR      |
|                     | BAP1                  | HES6      | PRPF19  | STAT5A    |
|                     | BCL2L1                | HLA-E     | PSMA1   | STRAP     |
|                     | BID                   | HNRNPC    | PSMA2   | THOC4     |
|                     | BST2                  | HNRPK     | PSMA3   | TIMELESS  |
|                     | CALM2                 | HSD17B1   | PSMA6   | TLN1      |
|                     | CAPN5                 | IFNA17    | PSMA7   | TLR10     |
|                     | CCL11                 | IFNG      | PSMB2   | TRAF3     |
|                     | CCL13                 | IGF2R     | PSMB4   | TSC2      |
|                     | CCL2                  | IL1RAP    | PSMB6   | TUBA1C    |
|                     | CD226                 | IL2       | PSMC1   | UBE1      |
|                     | CDC2L1                | IL4R      | PSMC2   | UBE2I     |
|                     | CDC40                 | ITGAV     | PSMD1   | UBE2L3    |
|                     | CFLAR                 | KIF3A     | PSMD11  | UBE2V2    |
|                     | CHD8                  | KPNB1     | PSMD12  | USP9X     |
|                     | CHGB                  | LIAS      | PSMD3   | WARS2     |
|                     | CLEC7A                | LOC391656 | PSMD8   | XAB2      |
|                     | COL8A1                | LPHN3     | PSMF1   | XCL1      |
|                     | COPS5                 | MCM4      | RAB11A  | YY1       |
|                     | COQ7                  | MCM6      | RAD21   | ZFP42     |
|                     | CPSF2                 | MTMR1     | RAG1    |           |
|                     | CTNNA1                | MYEF2     | RAN     |           |
|                     | CXCR4                 | NACA      | RARB    |           |
|                     | CYP21A2               | NADSYN1   | RBL2    |           |



|        |          |        |
|--------|----------|--------|
| DARS   | NARS     | RBX1   |
| DDHD1  | NRAS     | RFX4   |
| DDX41  | NT5C2    | RPA2   |
| DIDO1  | NXT1     | RPL30  |
| DKK4   | PAFAH1B2 | RPL8   |
| DLX3   | PBEF1    | RRM1   |
| DPYSL2 | PENK     | RTF1   |
| DSP    | PFDN2    | RUVBL2 |
| EFTUD2 | PIK3C3   | SAP18  |
| EIF1AX | PKN1     | SCD5   |

**Table S5. Top 40 connections that are predicted to sensitize cells to JG-98 according to analysis of the Connectivity Map.**

Table S5 Top 40 Connections

|    | <b>cmap_id</b> | <b>cmap_name</b>  | <b>score_best2</b> | <b>Target</b> |
|----|----------------|-------------------|--------------------|---------------|
| 1  | BRD-K13646352  | midostaurin       | 99.822             | TK            |
| 2  | BRD-K35960502  | niclosamide       | 99.486             |               |
| 3  | BRD-K74305673  | IKK-2-inhibitor-V | 99.147             |               |
| 4  | BRD-A58564983  | selamectin        | 99.404             |               |
| 5  | BRD-A08003242  | rhodomyrtoxin-b   | 99.134             |               |
| 6  | BRD-K01121114  | BRD-K01121114     | 98.875             |               |
| 7  | BRD-K92241597  | tosedostat        | 98.573             |               |
| 8  | BRD-K60623809  | SU-11652          | 99.239             | TK            |
| 9  | BRD-K76840893  | RS-17053          | 99.135             |               |
| 10 | BRD-K12184916  | NVP-BEZ235        | 98.542             | PI3K          |
| 11 | BRD-K38477985  | malonoben         | 98.732             |               |
| 12 | BRD-K67868012  | PI-103            | 99.207             | PI3K          |
| 13 | BRD-K06750613  | GSK-1059615       | 99.598             | PI3K          |
| 14 | BRD-K67075780  | TGX-115           | 99.422             | PI3K          |
| 15 | BRD-K99582188  | BRD-K99582188     | 97.737             |               |
| 16 | BRD-A34462049  | tigecycline       | 99.135             |               |
| 17 | BRD-K68065987  | MK-2206           | 98.773             | Akt           |
| 18 | BRD-A06352508  | SB-218078         | 98.258             | Chk1          |
| 19 | BRD-K33272502  | DG-041            | 97.765             |               |
| 20 | BRD-K86574132  | BRD-K86574132     | 99.176             |               |
| 21 | BRD-K15616905  | CCCP              | 98.324             |               |
| 22 | BRD-K55844427  | BRD-K55844427     | 99.228             |               |
| 23 | BRD-A50737080  | CGK-733           | 97.079             |               |
| 24 | BRD-K88677950  | PD-198306         | 97.378             |               |
| 25 | BRD-K50836978  | purvalanol-a      | 98.826             |               |
| 26 | BRD-K97365803  | PI-828            | 99.261             | PI3K          |
| 27 | BRD-K23319301  | BRD-K23319301     | 96.756             |               |
| 28 | BRD-A62809825  | thapsigargin      | 97.405             |               |
| 29 | BRD-K63068307  | ZSTK-474          | 99.11              | PI3K          |
| 30 | BRD-K67566344  | KU-0063794        | 99.035             | mTOR          |
| 31 | BRD-K28934562  | BRD-K28934562     | 97.185             |               |
| 32 | BRD-A59431241  | COL-3             | 95.997             |               |
| 33 | BRD-K64642496  | KO-143            | 96.465             |               |
| 34 | BRD-K73037408  | KUC111774N        | 95.055             |               |
| 35 | BRD-K69932463  | AZD-8055          | 96.998             | mTOR          |
| 36 | BRD-K40255344  | tyrphostin-A9     | 97.587             | TK            |
| 37 | BRD-K59469039  | AG-879            | 98.179             | TK            |
| 38 | BRD-A47829399  | artesanate        | 97.551             |               |
| 39 | BRD-M64432851  | sunitinib         | 99.152             | TK            |
| 40 | BRD-A11678676  | wortmannin        | 97.616             | mTOR          |
